# Supplementary material
Source: PubMed Central journal article supplement (PMC4402117)
Supplement: NIHMS654613-supplement-01.pdf [file NIHMS654613-supplement-01.pdf]

## Supplemental Data

### Psoriasis and cardiometabolic traits: modest association but distinct genetic architectures

Manja Koch<sup>1</sup>, PhD; Hansjörg Baurecht<sup>2</sup>, MSc; Janina S. Ried<sup>3</sup>, PhD; Elke Rodriguez<sup>2</sup>, PhD; Sabrina Schlesinger<sup>1</sup>, PhD; Natalie Volks, MD<sup>2</sup>; Christian Gieger<sup>4,5</sup>, PhD; Ina-Maria Rückert<sup>4</sup>, PhD; Luise Heinrich<sup>6</sup>, MSc; Christina Willenborg, PhD<sup>7</sup>; Catherine Smith<sup>8</sup>, MD; Annette Peters<sup>4</sup>, PhD; Barbara Thorand<sup>4</sup>, PhD; Wolfgang Koenig<sup>9</sup>, MD; Claudia Lamina<sup>10</sup>, PhD; Henning Jansen<sup>11</sup>, PhD; Florian Kronenberg<sup>10</sup>, MD; Jochen Seissler<sup>12</sup>, MD; Joachim Thiery<sup>13</sup>, MD; Wolfgang Rathmann<sup>14</sup>, MD; Heribert Schunkert<sup>11</sup>, MD; Jeanette Erdmann<sup>7</sup>, PhD; Jonathan Barker<sup>8</sup>, MD; Rajan P Nair<sup>15</sup>, PhD; Lam C Tsoi<sup>16</sup>, PhD; James T Elder<sup>15,17</sup>, MD; Ulrich Mrowietz<sup>2</sup>, MD; Michael Weichenthal<sup>2</sup>, MD; Sören Mucha<sup>18</sup>, MSc; Stefan Schreiber<sup>18,19</sup>, MD; Andre Franke<sup>18</sup>, PhD; Jochen Schmitt<sup>\*6</sup>, MD, Wolfgang Lieb<sup>\*1</sup>, MD, MSc; Stephan Weidinger<sup>\*2</sup>, MD

\* denotes equal contribution

<sup>1</sup>Institute of Epidemiology, Christian-Albrechts University Kiel, Kiel, Germany.

<sup>2</sup>Department of Dermatology, Allergology, and Venerology, University Hospital Schleswig-Holstein, Campus Kiel, Kiel, Germany.

<sup>3</sup>Institute of Genetic Epidemiology, Helmholtz Zentrum München - German Research Center for Environmental Health, Neuherberg, Germany.

<sup>4</sup>Institute of Epidemiology II, Helmholtz Zentrum München - German Research Center for Environmental Health, Neuherberg, Germany.

<sup>5</sup>Research Unit of Molecular Epidemiology, Helmholtz Zentrum München- German Research Center for Environmental Health, Neuherberg, Germany

<sup>6</sup>Center for Evidence-Based Healthcare, University Hospital Carl Gustav Carus, Technical University Dresden, Dresden, Germany.

<sup>7</sup>Institute for Integrative und Experimental Genomics and DZHK (German Research Centre for Cardiovascular Research), partner site Hamburg/Lübeck/Kiel, University Hospital Schleswig-Holstein, Campus Lübeck, Germany.

<sup>8</sup>St John's Institute of Dermatology, Division of Genetics and Molecular Medicine, Kings College London.

<sup>9</sup>Department of Internal Medicine II-Cardiology, University of Ulm Medical Center, Ulm, Germany.

<sup>10</sup>Division of Genetic Epidemiology, Department of Medical Genetics, Molecular and Clinical Pharmacology, Innsbruck Medical University, Schoepfstr. 41, A-6020 Innsbruck, Austria.

<sup>11</sup>Deutsches Herzzentrum Munich, Technische Universität Munich, Munich, Germany.

<sup>12</sup>Medizinische Klinik und Poliklinik IV, Diabetes Zentrum, Klinikum der Ludwig-Maximilians-Universität, Munich, Germany.

<sup>13</sup>Institute of Laboratory Medicine, Clinical Chemistry and Molecular Diagnostics, University Hospital Leipzig, Leipzig, Germany.

<sup>14</sup>German Diabetes Center, Leibniz Institute at Heinrich Heine University Düsseldorf, Institute of Biometrics and Epidemiology, Düsseldorf, Germany.

<sup>15</sup>Department of Dermatology, University of Michigan Medical School, Ann Arbor, Michigan, USA

<sup>16</sup>Department of Biostatistics, Center for Statistical Genetics, University of Michigan, Ann Arbor, Michigan, USA

<sup>17</sup>Ann-Arbor Veteran Affairs Hospital, Ann Arbor, MI, USA

<sup>18</sup>Institute of Clinical Molecular Biology, Christian-Albrechts-University of Kiel, Kiel, Germany.

<sup>19</sup>Department of Internal Medicine I, University Medical Center Schleswig-Holstein, Kiel, Germany

Table S1. Multivariable-adjusted beta coefficient for waist circumference and OR (95% confidence interval in parentheses) for type 2 diabetes or myocardial infarction per increment of predictor variables (n=4,180).

Table S2. Multivariable-adjusted Risk Ratios (RR; 95% confidence interval in parentheses) for cardiometabolic diseases per increment of predictor variables (n= 1,811,098)<sup>1</sup>.

Table S3: Systemic Therapies received by psoriasis patients of the longitudinal cohort in 2005/2006.

Table S4: Association of known CAD SNPs with psoriasis in psoriasis GWAS cohorts.

Table S5: Association of known psoriasis SNPs with CAD in the Coronary Artery Disease Genome-Wide Replication And Meta-Analysis (CARDIoGRAM).

Table S6: Cardiometabolic susceptibility loci (MetaboChip analysis) associated with psoriasis at a genome-wide significance level.

Table S7: SNPs with suggestive evidence ( $P < 5 \times 10^{-6}$ ) for association with psoriasis from the MetaboChip analysis.

Table S8: Results from the MetaboChip analysis for established psoriasis loci (GWASCatalog 2013-01).

Figure S1: Forest plot displaying the associations of each psoriasis single nucleotide polymorphism (SNP) with coronary artery disease (CAD) in the Coronary Artery Disease Genome-Wide Replication And Meta-Analysis (CARDIoGRAM).

Supplementary Methods

Table S1. Multivariable-adjusted beta coefficient for waist circumference and OR (95% confidence interval in parentheses) for type 2 diabetes or myocardial infarction per increment of predictor variables (n=4,185)<sup>1</sup>.

| Predictor variables               | Outcome variable                                            |                        |                                 |                      |                                          |                      |
|-----------------------------------|-------------------------------------------------------------|------------------------|---------------------------------|----------------------|------------------------------------------|----------------------|
|                                   | Change in waist circumference; Beta Coefficient<br>(95% CI) |                        | OR (95% CI) for type 2 diabetes |                      | OR (95% CI) for myocardial<br>infarction |                      |
|                                   | Model 1 <sup>2</sup>                                        | Model 2 <sup>3</sup>   | Model 1                         | Model 2 <sup>4</sup> | Model 1                                  | Model 2 <sup>4</sup> |
| Psoriasis (yes as compared to no) | 2.03 (0.36, 3.70)                                           | 1.70 (0.14, 3.26)      | 2.31 (1.41, 3.80)               | 2.37 (1.40, 4.02)    | 2.29 (1.17, 4.46)                        | 2.26 (1.03, 4.96)    |
| Sex (Female as compared to male)  | -11.65 (-12.36, -10.93)                                     | -10.38 (-11.13, -9.62) | 0.76 (0.58, 1.01)               | 0.77 (0.56, 1.08)    | 0.36 (0.23, 0.55)                        | 0.28 (0.17, 0.48)    |
| Age (per 1-unit increase)         | 0.30 (0.27, 0.33)                                           | 0.09 (0.05, 0.12)      | 1.08 (1.07, 1.09)               | 1.05 (1.03, 1.06)    | 1.09 (1.07, 1.11)                        | 1.03 (1.01, 1.06)    |
| Smoking status                    |                                                             |                        |                                 |                      |                                          |                      |
| Former (as compared to never)     | 1.68 (0.88, 2.49)                                           | 1.53 (0.77, 2.28)      | 1.28 (0.94, 1.75)               | 1.28 (0.92, 1.78)    | 1.85 (1.18, 2.90)                        | 1.70 (1.04, 2.78)    |
| Current (as compared to never)    | 0.19 (-0.83, 1.21)                                          | -0.02 (-0.99, 0.95)    | 1.50 (0.95, 2.37)               | 1.63 (1.01, 2.63)    | 1.96 (1.01, 3.83)                        | 2.23 (1.07, 4.65)    |
| Years of Education                |                                                             |                        |                                 |                      |                                          |                      |
| 10 y (as compared to ≤9 y)        | -3.00 (-3.88, -2.12) <sup>3</sup>                           | -2.59 (-3.43, -1.76)   | 0.66 (0.45, 0.87)               | 0.70 (0.47, 0.93)    | 0.60 (0.34, 0.86)                        | 0.63 (0.34, 0.92)    |

|                                                |                                   |                      |                                |                   |                                |                    |
|------------------------------------------------|-----------------------------------|----------------------|--------------------------------|-------------------|--------------------------------|--------------------|
|                                                |                                   |                      | 0.97) <sup>4</sup>             | 1.04)             | 1.05) <sup>4</sup>             | 1.14)              |
| ≥11 y (as compared to ≤9 y)                    | -4.37 (-5.28, -3.46) <sup>3</sup> | -3.55 (-4.42, -2.67) | 0.73 (0.49, 1.08) <sup>4</sup> | 0.83 (0.55, 1.26) | 0.50 (0.28, 0.90) <sup>4</sup> | 0.50 (0.27, 0.95)  |
| Alcohol intake (per 1 unit increase)           | 0.01 (-0.01, 0.03)                | 0.01 (-0.01, 0.03)   | 0.99 (0.98, 1.00) <sup>4</sup> | 0.99 (0.98, 1.00) | 0.98 (0.97, 0.99)              | 0.98 (0.97, 0.99)  |
| Physical activity                              |                                   |                      |                                |                   |                                |                    |
| Low activity (as compared to no activity)      | 0.14 (-1.09, 1.37)                | 0.80 (-0.37, 1.97)   | 1.04 (0.67, 1.62)              | 1.08 (0.68, 1.71) | 0.67 (0.33, 1.37)              | 0.70 (0.33, 1.50)  |
| Moderate activity (as compared to no activity) | -2.05 (-2.99, -1.10)              | -1.20 (-2.10, -0.30) | 0.80 (0.57, 1.11)              | 0.87 (0.62, 1.23) | 0.73 (0.45, 1.17)              | 0.78 (0.47, 1.31)  |
| High activity (as compared to no activity)     | -4.77 (-5.80, -3.73)              | -3.55 (-4.54, -2.56) | 0.39 (0.25, 0.61)              | 0.41 (0.26, 0.66) | 0.65 (0.38, 1.12)              | 0.74 (0.41, 1.34)  |
| Systolic blood pressure (per 1-unit increase)  | 0.11 (0.09, 0.13)                 | 0.09 (0.07, 0.11)    | 1.01 (1.01, 1.02)              | 1.01 (1.01, 1.02) | 0.99 (0.98, 1.00)              | 0.99 (0.98, 1.00)  |
| Hypertension treatment (yes as compared to no) | 7.36 (6.49, 8.22)                 | 6.54 (5.66, 7.41)    | 3.94 (2.81, 5.54)              | 2.95 (2.07, 4.20) | 15.80 (7.85, 31.78)            | 8.34 (4.04, 17.20) |
| Type 2 diabetes (yes as compared to no)        | 7.43 (5.84, 9.01)                 | 2.25 (-1.10, 5.59)   | NA                             | NA                | 2.57 (1.57, 4.20)              | 0.57 (0.10, 3.14)  |
| Type 2 diabetes treatment (yes as              | 8.15 (6.40, 9.90)                 | 3.06 (-0.61, 6.74)   | NA                             | NA                | 2.82 (1.69, 4.71)              | 2.11 (0.36,        |

|                                           |                   |                     |             |             |              |             |
|-------------------------------------------|-------------------|---------------------|-------------|-------------|--------------|-------------|
| compared to no)                           |                   |                     |             |             |              | 12.22)      |
| Lipid-lowering treatment (yes as compared | 1.64 (0.49, 2.79) | -0.74 (-1.86, 0.38) | 3.30 (2.45, | 2.67 (1.94, | 12.59 (8.15, | 8.00 (5.08, |
| to no)                                    |                   |                     | 4.44)       | 3.66)       | 19.45)       | 12.59)      |

---

<sup>1</sup>Model 1 was adjusted for sex and age (continuous). Model 2 was mutually adjusted for psoriasis (no, yes), sex, age (continuous), smoking status (never, former, current), years of education ( $\leq 9$  y, 10 y, or  $\geq 11$  y), alcohol intake (continuous), physical activity (no activity, low activity, moderate activity, high activity), systolic blood pressure (continuous), hypertension treatment (no, yes), type 2 diabetes (no, yes; except type 2 diabetes), type 2 diabetes treatment (no, yes; except type 2 diabetes), lipid-lowering treatment (no, yes). <sup>2</sup>n=4173. <sup>3</sup>n=4168. <sup>4</sup>n=4180.

Table S2. Multivariable-adjusted Risk Ratios (RR; 95% confidence interval in parentheses) for cardiometabolic diseases per increment of predictor variables (n= 1,811,098)<sup>1</sup>.

|                                                                                   | RR (95%CI)        |                   |
|-----------------------------------------------------------------------------------|-------------------|-------------------|
|                                                                                   | Model 1           | Model 2           |
| <b>Type 2 diabetes 2007-2012<sup>2</sup></b>                                      |                   |                   |
| Psoriasis (yes as compared to no)                                                 | 1.21 (1.18, 1.25) | 1.11 (1.08, 1.14) |
| Psoriasis, no medication (as compared to no psoriasis)                            | 1.16 (1.08, 1.23) | 1.06 (0.99, 1.13) |
| Psoriasis, exclusively topical medication (as compared to no psoriasis)           | 1.21 (1.17, 1.25) | 1.10 (1.07, 1.14) |
| Psoriasis, systemic medication (as compared to no psoriasis)                      | 1.38 (1.26, 1.51) | 1.25 (1.14, 1.37) |
| Sex (male as compared to female)                                                  | 1.24 (1.23, 1.25) | 1.30 (1.29, 1.32) |
| Age (per 1-unit increase)                                                         | 1.04 (1.04, 1.04) | 1.03 (1.03, 1.03) |
| Obesity (yes as compared to no)                                                   | 2.41 (2.38, 2.44) | 2.03 (2.01, 2.06) |
| Disorders of lipoprotein metabolism and other lipidaemias (yes as compared to no) | 1.42 (1.40, 1.44) | 1.19 (1.17, 1.20) |
| Hypertension (yes as compared to no)                                              | 1.93 (1.90, 1.96) | 1.65 (1.63, 1.67) |
| <b>Myocardial infarction 2007-2012<sup>3</sup></b>                                |                   |                   |
| Psoriasis (yes as compared to no)                                                 | 1.24 (1.15, 1.33) | 1.14 (1.06, 1.22) |
| Psoriasis, no medication (as compared to no psoriasis)                            | 1.10 (0.94, 1.30) | 1.01 (0.86, 1.19) |



|                                                                                   |                   |                   |
|-----------------------------------------------------------------------------------|-------------------|-------------------|
| Psoriasis, exclusively topical medication (as compared to no psoriasis)           | 1.23 (1.14, 1.34) | 1.13 (1.05, 1.23) |
| Psoriasis, systemic medication (as compared to no psoriasis)                      | 1.62 (1.30, 2.01) | 1.48 (1.19, 1.84) |
| Sex (male as compared to female)                                                  | 2.61 (2.54, 2.69) | 2.58 (2.51, 2.65) |
| Age (per 1-unit increase)                                                         | 1.05 (1.05, 1.05) | 1.04 (1.04, 1.04) |
| Obesity (yes as compared to no)                                                   | 1.43 (1.38, 1.48) | 1.12 (1.07, 1.16) |
| Disorders of lipoprotein metabolism and other lipidaemias (yes as compared to no) | 1.82 (1.77, 1.87) | 1.63 (1.59, 1.68) |
| Type 2 diabetes (yes as compared to no)                                           | 1.55 (1.51, 1.60) | 1.35 (1.31, 1.39) |
| Hypertension (yes as compared to no)                                              | 1.62 (1.57, 1.68) | 1.33 (1.29, 1.38) |

---

**Angina pectoris 2007-2012<sup>4</sup>**

|                                                                         |                   |                   |
|-------------------------------------------------------------------------|-------------------|-------------------|
| Psoriasis (yes as compared to no)                                       | 1.38 (1.30, 1.45) | 1.27 (1.20, 1.34) |
| Psoriasis, no medication (as compared to no psoriasis)                  | 1.29 (1.14, 1.46) | 1.17 (1.04, 1.33) |
| Psoriasis, exclusively topical medication (as compared to no psoriasis) | 1.38 (1.29, 1.47) | 1.28 (1.20, 1.36) |
| Psoriasis, systemic medication (as compared to no psoriasis)            | 1.57 (1.32, 1.86) | 1.43 (1.21, 1.70) |
| Sex (male as compared to female)                                        | 1.38 (1.35, 1.41) | 1.37 (1.34, 1.40) |
| Age (per 1-unit increase)                                               | 1.04 (1.04, 1.04) | 1.03 (1.03, 1.03) |
| Obesity (yes as compared to no)                                         | 1.56 (1.51, 1.60) | 1.27 (1.23, 1.31) |

|                                                                                   |                   |                   |
|-----------------------------------------------------------------------------------|-------------------|-------------------|
| Disorders of lipoprotein metabolism and other lipidaemias (yes as compared to no) | 1.87 (1.83, 1.91) | 1.67 (1.63, 1.71) |
| Type 2 diabetes (yes as compared to no)                                           | 1.15 (1.12, 1.18) | 0.95 (0.93, 0.98) |
| Hypertension (yes as compared to no)                                              | 1.78 (1.73, 1.83) | 1.52 (1.48, 1.56) |

---

**Stroke 2007-2012<sup>5</sup>**

|                                                                                   |                   |                   |
|-----------------------------------------------------------------------------------|-------------------|-------------------|
| Psoriasis (yes as compared to no)                                                 | 1.17 (1.11, 1.23) | 1.11 (1.06, 1.17) |
| Psoriasis, no medication (as compared to no psoriasis)                            | 1.10 (0.99, 1.24) | 1.05 (0.94, 1.18) |
| Psoriasis, exclusively topical medication (as compared to no psoriasis)           | 1.19 (1.12, 1.26) | 1.13 (1.07, 1.20) |
| Psoriasis, systemic medication (as compared to no psoriasis)                      | 1.14 (0.95, 1.36) | 1.08 (0.90, 1.29) |
| Sex (male as compared to female)                                                  | 1.33 (1.31, 1.36) | 1.32 (1.30, 1.35) |
| Age (per 1-unit increase)                                                         | 1.06 (1.06, 1.06) | 1.06 (1.06, 1.06) |
| Obesity (yes as compared to no)                                                   | 1.23 (1.19, 1.26) | 1.04 (1.01, 1.07) |
| Disorders of lipoprotein metabolism and other lipidaemias (yes as compared to no) | 1.24 (1.22, 1.27) | 1.13 (1.11, 1.16) |
| Type 2 diabetes (yes as compared to no)                                           | 1.43 (1.40, 1.46) | 1.33 (1.30, 1.35) |
| Hypertension (yes as compared to no)                                              | 1.45 (1.42, 1.49) | 1.33 (1.30, 1.36) |

---

<sup>1</sup>Model was adjusted for sex and age (continuous). Model 2 was mutually adjusted for psoriasis (no, yes), sex, age (continuous), hypertension (no, yes); type 2 diabetes (no, yes; except for outcome type 2 diabetes); obesity and disorders of lipoprotein metabolism and other lipidaemias (no, yes).

<sup>2</sup>n=1,514,541. <sup>3</sup>n=1,773,833. <sup>4</sup>n=1,715,269. <sup>5</sup>n=1,746,355.

Table S3: Systemic Therapies received by Psoriasis Patients of the longitudinal cohort in 2005/2006.

| Systemic Therapy<br>2005/2006 | No. of Patients with<br>Psoriasis | % of Patients with Psoriasis<br>(n= 44,623) | % of Patients with Psoriasis and Systemic<br>Therapy (n=4,271) |
|-------------------------------|-----------------------------------|---------------------------------------------|----------------------------------------------------------------|
| UV Therapy                    | 2,127                             | 4.8%                                        | 49.8%                                                          |
| Adalimumab                    | 84                                | 0.2%                                        | 2.0%                                                           |
| Etanercept                    | 125                               | 0.3%                                        | 2.9%                                                           |
| Infliximab                    | 42                                | 0.1%                                        | 1.0%                                                           |
| Acitretin                     | 232                               | 0.5%                                        | 5.4%                                                           |
| Cyclosporine                  | 124                               | 0.3%                                        | 2.9%                                                           |
| Fumaric Acid                  | 801                               | 1.8%                                        | 18.8%                                                          |
| Methotrexate                  | 1,324                             | 3.0%                                        | 31.0%                                                          |

Table S4. Association of known CAD SNPs (CARDIoGRAM &amp; GWASCatalog 2013-01) with psoriasis in psoriasis GWAS cohorts.

| SNP                    | CHR | POS       | EA/OA | Effect Allele Freq | OR (95% CI) for psoriasis | P value                | Direction | Gene                |
|------------------------|-----|-----------|-------|--------------------|---------------------------|------------------------|-----------|---------------------|
| rs11206510             | 1   | 55496039  | T/C   | 0.8115             | 0.988 (0.919-1.062)       | 0.745                  | ++        | PCSK9               |
| rs17114036             | 1   | 56962821  | A/G   | 0.9126             | 1.105 (0.998-1.224)       | 0.05414                | +++       | PPAP2B              |
| rs12740374             | 1   | 109817590 | T/G   | 0.2229             | 0.994 (0.929-1.064)       | 0.8667                 | +/-       | CELSR2              |
| rs646776               | 1   | 109818530 | T/C   | 0.7765             | 1.004 (0.938-1.075)       | 0.9009                 | ++        | CELSR2              |
| rs599839               | 1   | 109822166 | A/G   | 0.7685             | 1.002 (0.935-1.074)       | 0.9492                 | ++        | SORT1               |
| rs4845625              | 1   | 154422067 | T/C   | 0.4281             | 1.034 (0.976-1.095)       | 0.2563                 | +++       | IL6R                |
| rs17465637             | 1   | 222823529 | A/C   | 0.2881             | 0.992 (0.924-1.065)       | 0.8203                 | ++        | MIA3                |
| rs2123536              | 2   | 19945577  | T/C   | 0.0512             | 1.014 (0.888-1.158)       | 0.8395                 | ++        | TTC32-WDR35         |
| rs515135               | 2   | 21286057  | T/C   | 0.1806             | 1.008 (0.934-1.086)       | 0.845                  | ++        | APOB                |
| rs6544713              | 2   | 44073881  | T/C   | 0.3173             | 0.991 (0.932-1.054)       | 0.7697                 | +-        | ABCG5-ABCG8         |
| rs1561198              | 2   | 85809989  | T/C   | 0.4592             | 1.019 (0.963-1.079)       | 0.5054                 | ++        | VAMP5-VAMP8-GGCX    |
| rs2252641              | 2   | 145801461 | T/C   | 0.5513             | 1.041 (0.984-1.103)       | 0.1626                 | +++       | ZEB2-AC074093.1     |
| rs6725887              | 2   | 203745885 | T/C   | 0.8683             | 0.953 (0.864-1.051)       | 0.3322                 | -?+       | WDR12               |
| rs2306374              | 3   | 138119952 | T/C   | 0.843              | 0.992 (0.905-1.087)       | 0.8624                 | +?-       | MRAS                |
| rs9818870              | 3   | 138122122 | T/C   | 0.154              | 1.006 (0.929-1.089)       | 0.8915                 | ++        | MRAS                |
| rs1878406              | 4   | 148393664 | T/C   | 0.1402             | 0.982 (0.905-1.067)       | 0.669                  | ---       | EDNRA               |
| rs1842896              | 4   | 156511459 | T/G   | 0.5261             | 0.962 (0.908-1.019)       | 0.1894                 | ++        | MTND1P22-GUCY1A3    |
| rs7692387              | 4   | 156635309 | A/G   | 0.1884             | 0.979 (0.91-1.053)        | 0.5649                 | +/-       | GUCY1A3             |
| rs273909               | 5   | 131667353 | A/G   | 0.8874             | 1.074 (0.966-1.194)       | 0.1879                 | +?-       | SLC22A4-SLC22A5     |
| rs6903956              | 6   | 11774583  | A/G   | 0.3807             | 1.042 (0.982-1.106)       | 0.1759                 | ++        | C6orf105            |
| rs9349379              | 6   | 12903957  | A/G   | 0.6005             | 0.934 (0.873-1)           | 0.05082                | -?-       | PHACTR1             |
| rs2894181 <sup>1</sup> | 6   | 31174527  | A/G   | 0.5615             | 1.413(1.318-1.514)        | 1.58x10 <sup>-22</sup> | +?+       | HLA-C, HLA-B, HCG27 |
| rs6932542 <sup>2</sup> | 6   | 32380262  | A/G   | 0.547              | 1.488(1.389-1.595)        | 1.51x10 <sup>-29</sup> | -?-       | BTNL2               |
| rs12190287             | 6   | 134214525 | C/G   | 0.6227             | 0.994 (0.934-1.059)       | 0.8622                 | ++        | TCF21               |
| rs6922269              | 6   | 151252985 | A/G   | 0.267              | 0.99 (0.928-1.056)        | 0.7554                 | ++        | MTHFD1L             |
| rs2023938              | 7   | 19036775  | T/C   | 0.9029             | 1.013 (0.906-1.134)       | 0.8146                 | -?+       | HDAC9               |

|            |    |           |     |        |                     |        |     |                       |
|------------|----|-----------|-----|--------|---------------------|--------|-----|-----------------------|
| rs10953541 | 7  | 107244545 | T/C | 0.2501 | 0.966 (0.904-1.031) | 0.2982 | --- | BCAP29                |
| rs11556924 | 7  | 129663496 | T/C | 0.3723 | 1.054 (0.943-1.177) | 0.3526 | ?+? | ZC3HC1                |
| rs6601299  | 8  | 9184691   | T/C | 0.0955 | 1.033 (0.938-1.138) | 0.5136 | ++  | LOC157273             |
| rs264      | 8  | 19813180  | A/G | 0.1384 | 0.942 (0.866-1.026) | 0.1697 | --- | LPL                   |
| rs2954029  | 8  | 126490972 | A/T | 0.5328 | 0.993 (0.938-1.051) | 0.802  | +-  | TRIB1                 |
| rs7865618  | 9  | 22031005  | A/G | 0.5734 | 1.021 (0.917-1.138) | 0.7028 | ?+? | CDKN2B-AS1            |
| rs10757274 | 9  | 22096055  | A/G | 0.5111 | 0.965 (0.909-1.023) | 0.2339 | --- | CDKN2B-AS1            |
| rs4977574  | 9  | 22098574  | A/G | 0.511  | 0.961 (0.906-1.02)  | 0.1936 | --- | CDKN2B-AS1            |
| rs944797   | 9  | 22115286  | T/C | 0.4937 | 0.96 (0.904-1.019)  | 0.179  | --- | CDKN2B-AS1            |
| rs1333049  | 9  | 22125503  | C/G | 0.4761 | 1.024 (0.963-1.089) | 0.449  | +++ | CDKN2A,CDKN2B         |
| rs514659   | 9  | 136142203 | A/C | 0.6609 | 0.961 (0.905-1.02)  | 0.1914 | --- | ABO                   |
| rs579459   | 9  | 136154168 | T/C | 0.7834 | 0.946 (0.883-1.014) | 0.1171 | --- | ABO                   |
| rs3739998  | 10 | 30316072  | C/G | 0.5681 | 0.999 (0.944-1.058) | 0.9812 | --+ | KIAA1462              |
| rs2505083  | 10 | 30335122  | T/C | 0.5727 | 0.989 (0.932-1.049) | 0.7042 | --+ | KIAA1462              |
| rs1746048  | 10 | 44775824  | T/C | 0.1317 | 0.93 (0.854-1.012)  | 0.0919 | --- | CXCL12                |
| rs1412444  | 10 | 91002927  | T/C | 0.3374 | 1.019 (0.959-1.082) | 0.5436 | +++ | LIPA                  |
| rs12413409 | 10 | 104719096 | A/G | 0.0862 | 0.944 (0.853-1.045) | 0.2672 | --+ | CYP17A1,CNNM2,NT5C2   |
| rs974819   | 11 | 103660567 | T/C | 0.2911 | 1.027 (0.965-1.093) | 0.4104 | ++  | PDGFD                 |
| rs964184   | 11 | 116648917 | C/G | 0.8648 | 1.035 (0.951-1.126) | 0.4249 | +++ | ZNF259,APOA5-A4-C3-A1 |
| rs7136259  | 12 | 90081188  | T/C | 0.4262 | 0.987 (0.931-1.047) | 0.6755 | +-  | ATP2B1                |
| rs3782889  | 12 | 111350655 | A/G | 0.9309 | 1.017 (0.891-1.16)  | 0.8033 | +?- | MYL2                  |
| rs9319428  | 13 | 28973621  | A/G | 0.2954 | 1.004 (0.943-1.069) | 0.9061 | ++  | FLT1                  |
| rs4773144  | 13 | 110960712 | A/G | 0.5735 | 1.026 (0.965-1.091) | 0.4045 | +-  | COL4A1,COL4A2         |
| rs2895811  | 14 | 100133942 | T/C | 0.5754 | 0.985 (0.931-1.043) | 0.6145 | --- | HHIPL1                |
| rs1994016  | 15 | 79080234  | T/C | 0.4119 | 0.987 (0.93-1.048)  | 0.6712 | +-  | ADAMTS7               |
| rs3825807  | 15 | 79089111  | A/G | 0.5603 | 1.006 (0.95-1.066)  | 0.8336 | ++  | ADAMTS7               |
| rs4380028  | 15 | 79111093  | T/C | 0.4003 | 0.985 (0.928-1.046) | 0.6265 | +-  | ADAMTS7-RPL21P116     |
| rs17514846 | 15 | 91416550  | A/C | 0.4664 | 0.995 (0.936-1.059) | 0.8851 | --+ | FURIN-FES             |
| rs1231206  | 17 | 2125605   | A/G | 0.3461 | 1.01 (0.952-1.072)  | 0.7422 | ++  | SMG6                  |
| rs216172   | 17 | 2126504   | C/G | 0.3463 | 1.01 (0.951-1.072)  | 0.7492 | ++  | SMG6, SRR             |

|            |    |          |     |        |                     |        |     |                       |
|------------|----|----------|-----|--------|---------------------|--------|-----|-----------------------|
| rs12936587 | 17 | 17543722 | A/G | 0.4611 | 0.994 (0.938-1.054) | 0.8441 | --+ | RASD1,SMCR3,PEMT      |
| rs46522    | 17 | 46988597 | T/C | 0.5294 | 1.03 (0.973-1.09)   | 0.3146 | +-  | UBE2Z,GIP,ATP5G1,SNF8 |
| rs2075650  | 19 | 45395619 | A/G | 0.8542 | 0.985 (0.905-1.072) | 0.7294 | +-  | APOE/TOMM40           |

<sup>1</sup>rs2894181 is a proxy SNP for the CAD SNP rs3869109 ( $r^2=0.736$  HapMap V3 release 27). The major allele of both SNPs increase the risk for CAD and psoriasis.

<sup>2</sup>rs6932542 is a proxy SNP for the CAD SNP rs9268402 ( $r^2=0.659$  HapMap V3 release 27). The major allele of both SNPs increase the risk for CAD and psoriasis.

Abbreviations: OR, odds ratio; CI, confidence interval; SNP single nucleotide polymorphism. Effect directions are given for the 3 psoriasis studies included in the meta-analysis.

Table S5. Association of known psoriasis SNPs with CAD in the Coronary Artery Disease Genome-Wide Replication And Meta-Analysis (CARDIoGRAM).

| SNP        | CHR | POS       | EA/OA | Effect Allele<br>Freq | OR (95% CI)<br>for CAD | P value | Gene            |
|------------|-----|-----------|-------|-----------------------|------------------------|---------|-----------------|
| rs11121129 | 1   | 8268095   | A/G   | 0.312                 | 1.018(0.988-1.049)     | 0.24318 | SLC45A1,TNFRSF9 |
| rs7667     | 1   | 19718824  | A/G   | 0.343                 | 1.029(1.000-1.059)     | 0.04979 | CAPZB           |
| rs7552167  | 1   | 24518643  | G/A   | 0.874                 | 0.987(0.939-1.038)     | 0.61123 | IL28RA          |
| rs4649203  | 1   | 24519920  | A/G   | 0.714                 | 1.000(0.954-1.047)     | 0.98851 | IL28RA          |
| rs7536201  | 1   | 25293084  | NA    | NA                    | NA                     | NA      | RUNX3           |
| rs2201841  | 1   | 67694202  | G/A   | 0.309                 | 0.995(0.966-1.025)     | 0.73119 | IL23R           |
| rs11209026 | 1   | 67705958  | G/A   | 0.909                 | 1.040(0.982-1.101)     | 0.18466 | IL23R           |
| rs4085613  | 1   | 152550018 | T/G   | 0.332                 | 1.025(0.996-1.056)     | 0.09067 | LCE3D,LCE3A     |
| rs4112788  | 1   | 152551276 | G/A   | 0.659                 | 0.975(0.947-1.004)     | 0.09032 | LCE3D           |
| rs702873   | 2   | 61081542  | C/T   | 0.576                 | 1.002(0.975-1.030)     | 0.90074 | REL             |
| rs842636   | 2   | 61091950  | G/A   | 0.568                 | 1.000(0.973-1.028)     | 0.9962  | NR              |
| rs10865331 | 2   | 62551472  | A/G   | 0.386                 | 0.993(0.966-1.021)     | 0.61057 | B3GNT2          |
| rs17716942 | 2   | 163260691 | T/C   | 0.864                 | 1.057(1.012-1.105)     | 0.01276 | IFIH1           |
| rs6809854  | 3   | 18784423  | G/A   | 0.179                 | 1.019(0.983-1.056)     | 0.31118 | Intergenic      |
| rs1386478  | 3   | 113680951 | A/G   | 0.731                 | 0.990(0.960-1.021)     | 0.52654 | ZDHHC23         |
| rs27524    | 5   | 96101944  | A/G   | 0.379                 | 0.981(0.953-1.009)     | 0.17253 | ERAP1           |
| rs20541    | 5   | 131995964 | G/A   | 0.792                 | 1.018(0.984-1.054)     | 0.30554 | IL13            |
| rs17728338 | 5   | 150478318 | A/G   | 0.089                 | 1.052(0.993-1.113)     | 0.08479 | TNIP1           |
| rs2082412  | 5   | 158717789 | G/A   | 0.791                 | 1.004(0.970-1.038)     | 0.83254 | IL12B           |
| rs2546890  | 5   | 158759900 | A/G   | 0.545                 | 0.996(0.966-1.027)     | 0.79886 | IL12B           |
| rs12188300 | 5   | 158829527 | T/A   | 0.084                 | 1.026(0.971-1.085)     | 0.36263 | IL12B           |
| rs9504361  | 6   | 577820    | A/G   | 0.542                 | 1.007(0.979-1.035)     | 0.62986 | EXOC2, IRF4     |
| rs1265181  | 6   | 31155785  | G/C   | 0.778                 | 1.058(1.022-1.095)     | 0.00132 | MHC             |
| rs12191877 | 6   | 31252925  | T/C   | 0.134                 | 0.941(0.903-0.980)     | 0.00363 | HLA-C           |
| rs10484554 | 6   | 31274555  | T/C   | 0.132                 | 0.935(0.897-0.975)     | 0.00162 | HLA-C           |



|            |    |           |     |       |                    |         |                      |
|------------|----|-----------|-----|-------|--------------------|---------|----------------------|
| rs3134792  | 6  | 31312326  | T/G | 0.866 | 1.029(0.977-1.084) | 0.28041 | HLA-C                |
| rs2395029  | 6  | 31431780  | G/T | 0.072 | 0.947(0.882-1.018) | 0.14039 | HLA-C                |
| rs465969   | 6  | 111655530 | G/A | 0.882 | 0.991(0.944-1.040) | 0.70507 | REV3L                |
| rs240993   | 6  | 111673714 | T/C | 0.271 | 1.027(0.996-1.059) | 0.08786 | TRAF3IP2             |
| rs33980500 | 6  | 111913262 | NA  | NA    | NA                 | NA      | TRAF3IP2             |
| rs610604   | 6  | 138199417 | G/T | 0.315 | 1.022(0.992-1.053) | 0.16035 | TNFAIP3              |
| rs2451258  | 6  | 159506600 | T/C | 0.62  | 0.995(0.964-1.027) | 0.74364 | TAGAP                |
| rs2700987  | 7  | 37386237  | NA  | NA    | NA                 | NA      | ELMO1                |
| rs11795343 | 9  | 32523737  | T/C | 0.587 | 1.011(0.983-1.039) | 0.4536  | DDX58                |
| rs10979182 | 9  | 110817020 | A/G | 0.566 | 0.979(0.952-1.006) | 0.12773 | KLF4                 |
| rs1076160  | 9  | 135776034 | T/C | 0.516 | 1.003(0.976-1.031) | 0.84455 | TSC1                 |
| rs1250544  | 10 | 81032885  | G/A | 0.622 | 0.973(0.945-1.003) | 0.07432 | ZMIZ1                |
| rs4561177  | 11 | 109962432 | A/G | 0.582 | 0.986(0.959-1.014) | 0.31664 | ZC3H12C              |
| rs3802826  | 11 | 128406438 | NA  | NA    | NA                 | NA      | ETS1                 |
| rs12580100 | 12 | 56439209  | A/G | 0.886 | 1.063(0.997-1.132) | 0.06101 | RPS26                |
| rs2066808  | 12 | 56737973  | A/G | 0.924 | 1.047(0.993-1.104) | 0.08791 | IL23A                |
| rs7993214  | 13 | 40350912  | C/T | 0.667 | 0.981(0.953-1.010) | 0.20086 | COG6                 |
| rs12586317 | 14 | 35682172  | NA  | NA    | NA                 | NA      | NFKBIA,PSMA6         |
| rs8016947  | 14 | 35832666  | G/T | 0.559 | 1.000(0.972-1.028) | 0.97265 | NFKBIA               |
| rs4780355  | 16 | 11347858  | T/C | 0.707 | 1.001(0.971-1.033) | 0.92454 | SOCS1                |
| rs10782001 | 16 | 30942625  | G/A | 0.345 | 0.994(0.966-1.023) | 0.67324 | FBXL19,POL3S         |
| rs1975974  | 17 | 21707060  | G/A | 0.212 | 1.005(0.971-1.040) | 0.78707 | NR                   |
| rs4795067  | 17 | 26106675  | G/A | 0.359 | 1.009(0.979-1.039) | 0.57251 | NOS2                 |
| rs963986   | 17 | 40561579  | C/G | 0.188 | 1.027(0.990-1.066) | 0.15581 | PTRF, STAT3,STAT5A/B |
| rs11652075 | 17 | 78178893  | C/T | 0.487 | 0.992(0.961-1.024) | 0.61135 | CARD14               |
| rs545979   | 18 | 51819750  | T/C | 0.314 | 1.024(0.994-1.055) | 0.11432 | POL1, STARD6, MBD2   |
| rs12720356 | 19 | 10469975  | A/C | 0.931 | 1.021(0.941-1.108) | 0.61974 | TYK2                 |
| rs280519   | 19 | 10472933  | A/G | 0.494 | 1.031(0.991-1.072) | 0.12591 | TYK2                 |
| rs892085   | 19 | 10818092  | A/G | 0.608 | 1.048(1.018-1.079) | 0.00174 | ILF3,CARM1           |
| rs1008953  | 20 | 43980726  | C/T | 0.761 | 1.025(0.992-1.059) | 0.13167 | SDC4                 |

---

|           |    |          |     |       |                    |         |        |
|-----------|----|----------|-----|-------|--------------------|---------|--------|
| rs495337  | 20 | 48522330 | G/A | 0.583 | 1.003(0.973-1.034) | 0.85114 | SPATA2 |
| rs4821124 | 22 | 21979289 | C/T | 0.219 | 1.001(0.968-1.036) | 0.94084 | UBE2L3 |

---

Table S6. Cardiometabolic susceptibility loci (MetaboChip analysis) associated with psoriasis at a genome-wide significance level.<sup>1</sup>

| SNP        | Chr | Position (hg18) | EA/OA | EAF   | Effect | se (effect) | P value  | R <sup>2</sup> | Next Reference Gene |
|------------|-----|-----------------|-------|-------|--------|-------------|----------|----------------|---------------------|
| rs10484554 | 6   | 31382534        | T/C   | 0.183 | 0.706  | 0.087       | 5.84E-16 | 1              | HLA-C               |
| rs4406273  | 6   | 31374069        | A/G   | 0.121 | 0.841  | 0.113       | 8.57E-14 | 0.61           | NA                  |
| rs9468929  | 6   | 31371195        | A/G   | 0.195 | 0.618  | 0.086       | 5.51E-13 | 0.93           | HLA-C               |
| rs2245822  | 6   | 31338779        | A/G   | 0.280 | 0.623  | 0.087       | 6.99E-13 | 0.57           | HLA-C               |
| rs9468928  | 6   | 31371022        | G/A   | 0.239 | 0.458  | 0.075       | 8.52E-10 | 0.71           | NA                  |
| rs28894987 | 6   | 31372281        | C/A   | 0.237 | 0.451  | 0.075       | 1.56E-09 | 0.71           | NA                  |
| rs2249742  | 6   | 31348700        | T/C   | 0.495 | 0.434  | 0.072       | 1.68E-09 | 0.22           | HLA-C               |
| rs13437082 | 6   | 31462539        | T/C   | 0.277 | 0.371  | 0.063       | 4.36E-09 | 0.06           | HLA-B               |
| rs4711268  | 6   | 31462483        | T/C   | 0.277 | 0.369  | 0.063       | 5.32E-09 | 0.06           | HLA-B               |
| rs10947207 | 6   | 31469464        | C/T   | 0.276 | 0.368  | 0.063       | 6.60E-09 | 0.06           | HLA-B               |
| rs6909321  | 6   | 31201169        | A/G   | 0.138 | 0.597  | 0.103       | 7.20E-09 | 0.46           | NA                  |
| rs3778639  | 6   | 31201755        | G/A   | 0.140 | 0.584  | 0.101       | 7.48E-09 | 0.45           | CDSN                |
| rs887468   | 6   | 31249502        | A/G   | 0.303 | 0.492  | 0.085       | 8.42E-09 | 0.48           | POU5F1              |
| rs4711269  | 6   | 31462798        | T/C   | 0.278 | 0.363  | 0.063       | 8.62E-09 | 0.06           | HLA-B               |
| rs9501106  | 6   | 31496088        | A/G   | 0.166 | 0.420  | 0.074       | 1.13E-08 | 0.16           | HCP5                |
| rs6932730  | 6   | 31462161        | C/T   | 0.209 | 0.393  | 0.069       | 1.30E-08 | 0.12           | HLA-B               |
| rs2853926  | 6   | 31371030        | C/T   | 0.281 | 0.400  | 0.071       | 1.56E-08 | 0.57           | HLA-C               |
| rs9469003  | 6   | 31515807        | C/T   | 0.166 | 0.412  | 0.073       | 2.04E-08 | 0.16           | HCP5                |
| rs2596480  | 6   | 31533964        | A/G   | 0.061 | -0.719 | 0.129       | 2.61E-08 | 0.01           | HCP5                |
| rs6923313  | 6   | 31349349        | C/T   | 0.408 | 0.391  | 0.071       | 3.14E-08 | 0.31           | HLA-C               |
| rs3094584  | 6   | 31491827        | T/C   | 0.141 | -0.478 | 0.087       | 3.97E-08 | 0.03           | HCP5                |

Abbreviations: Chr, chromosome; EA, effect allele; EAF, effect allele frequency; OA, other allele.

<sup>1</sup>For each SNP the LD (R<sup>2</sup>) to the SNP with the lowest p-value (rs10484554) is given.

Table S7. SNPs with suggestive evidence ( $P < 5 \times 10^{-6}$ ) for association with psoriasis from the MetaboChip analysis.

| SNP        | Chr | Pos       | EA/OA | EAF    | OR   | beta (SE)    | P value  | Gene     | MAF   | Call rate |
|------------|-----|-----------|-------|--------|------|--------------|----------|----------|-------|-----------|
| rs3780605  | 9   | 73498209  | T/C   | 0.1531 | 1.42 | 0.35 (0.07)  | 1.04E-06 | TMEM2    | 0.153 | 0.996     |
| rs10760553 | 9   | 100659831 | A/G   | 0.3136 | 1.31 | 0.27 (0.06)  | 2.97E-06 | none     | 0.314 | 0.995     |
| rs1892497  | 10  | 80713713  | T/C   | 0.2899 | 0.74 | -0.31 (0.06) | 1.29E-06 | ZMIZ1    | 0.290 | 0.998     |
| rs7927459  | 11  | 100204269 | G/C   | 0.1155 | 1.44 | 0.36 (0.08)  | 4.50E-06 | ARHGAP42 | 0.116 | 1.000     |
| rs4772974  | 13  | 107926181 | C/T   | 0.2961 | 1.32 | 0.28 (0.06)  | 2.90E-06 | none     | 0.296 | 0.999     |

Abbreviations: BP, base pair; Chr, chromosome; EA, effect allele; EAF, effect allele frequency; MAF, minor allele frequency; OA, other allele; OR, odds ratio; Pos, position; SE, standard error; SNP single nucleotide polymorphism.

Table S8. Results from the MetaboChip analysis for established psoriasis loci (GWASCatalog 2013-01).<sup>1</sup>

| Reported gene                                                                                          | Previously reported SNP                                                 | SNP in 500kb region with good quality and best p-value <sup>2</sup> | Chr | Position of SNP on metabochip (hg18) | Dist (KB) | Results for best SNP in region in our study |      |      |          |                |
|--------------------------------------------------------------------------------------------------------|-------------------------------------------------------------------------|---------------------------------------------------------------------|-----|--------------------------------------|-----------|---------------------------------------------|------|------|----------|----------------|
|                                                                                                        |                                                                         |                                                                     |     |                                      |           | EA/OA                                       | EAF  | OR   | P        | r <sup>2</sup> |
| <b>Loci replicated meeting a Bonferroni corrected significance level of 0.05/45=0.0011<sup>1</sup></b> |                                                                         |                                                                     |     |                                      |           |                                             |      |      |          |                |
| RUNX3                                                                                                  | rs7536201 (Tsoi <i>et al.</i> , 2012)                                   | rs10903118                                                          | 1   | 25167465                             | 1.8       | C/T                                         | 0.48 | 1.24 | 6.71E-05 | 1.000          |
| TNIP1                                                                                                  | rs17728338 (Nair <i>et al.</i> , 2009)                                  | rs17728338                                                          | 5   | 150458511                            | 0.0       | A/G                                         | 0.06 | 1.55 | 1.60E-05 | 1.000          |
| IL12B                                                                                                  | rs12188300 (Tsoi <i>et al.</i> , 2012)                                  | rs3212218                                                           | 5   | 158687174                            | 74.9      | T/G                                         | 0.20 | 0.76 | 1.06E-04 | 0.009          |
| IL12B                                                                                                  | rs2082412 (Nair <i>et al.</i> , 2009)                                   | rs3212218                                                           | 5   | 158687174                            | 36.8      | T/G                                         | 0.20 | 0.76 | 1.06E-04 | 1.000          |
| IL12B                                                                                                  | rs2546890 (Ellinghaus <i>et al.</i> , 2010)                             | rs3212218                                                           | 5   | 158687174                            | 5.3       | T/G                                         | 0.20 | 0.76 | 1.06E-04 | 0.311          |
| HLA-C                                                                                                  | rs10484554 (Liu <i>et al.</i> , 2008; Strange <i>et al.</i> , 2010)     | rs10484554                                                          | 6   | 31382534                             | 0.0       | T/C                                         | 0.18 | 2.03 | 5.84E-16 | 1.000          |
| HLA-C                                                                                                  | rs12191877 (Ellinghaus <i>et al.</i> , 2010; Nair <i>et al.</i> , 2009) | rs10484554                                                          | 6   | 31382534                             | 21.6      | T/C                                         | 0.18 | 2.03 | 5.84E-16 | -              |
| HLA-C                                                                                                  | rs2395029 (Liu <i>et al.</i> , 2008)                                    | rs10484554                                                          | 6   | 31382534                             | 157.2     | T/C                                         | 0.18 | 2.03 | 5.84E-16 | -              |
| HLA-C                                                                                                  | rs3134792 (Capon <i>et al.</i> , 2008)                                  | rs10484554                                                          | 6   | 31382534                             | 37.8      | T/C                                         | 0.18 | 2.03 | 5.84E-16 | -              |
| ZMIZ1                                                                                                  | rs1250544 (Ellinghaus <i>et al.</i> , 2012)                             | rs1892497                                                           | 10  | 80713713                             | 10.8      | T/C                                         | 0.29 | 0.74 | 1.29E-06 | 0.670          |

|                                                                     |                                                                     |            |    |           |       |     |      |      |          |       |
|---------------------------------------------------------------------|---------------------------------------------------------------------|------------|----|-----------|-------|-----|------|------|----------|-------|
| RPS26                                                               | rs12580100 (Stuart <i>et al.</i> , 2010)                            | rs2066818  | 12 | 55040089  | 314.6 | T/G | 0.06 | 0.58 | 4.68E-05 | 0.205 |
| IL23A                                                               | rs2066808 (Nair <i>et al.</i> , 2009; Strange <i>et al.</i> , 2010) | rs2066818  | 12 | 55040089  | 15.8  | T/G | 0.06 | 0.58 | 4.68E-05 | 1.000 |
| NFKBIA,<br>PSMA6                                                    | rs12586317 (Stuart <i>et al.</i> , 2010)                            | rs1712355  | 14 | 34417263  | 334.7 | T/G | 0.49 | 0.79 | 1.49E-05 | 0.169 |
| NFKBIA                                                              | rs8016947 (Strange <i>et al.</i> , 2010; Tsoi <i>et al.</i> , 2012) | rs1712355  | 14 | 34417263  | 485.2 | T/G | 0.49 | 0.79 | 1.49E-05 | 0.098 |
| FBXL19,<br>POL3S                                                    | rs10782001 (Stuart <i>et al.</i> , 2010)                            | rs11865499 | 16 | 31039751  | 189.6 | G/A | 0.30 | 1.26 | 6.22E-05 | 0.377 |
| <b>Loci not replicated (but well covered by the Metabochip)</b>     |                                                                     |            |    |           |       |     |      |      |          |       |
| IL28RA                                                              | rs4649203 (Strange <i>et al.</i> , 2010)                            | rs10794648 | 1  | 24390793  | 1.7   | T/C | 0.25 | 0.89 | 0.0736   | 0.954 |
| <b>Loci not replicated (and not well covered by the Metabochip)</b> |                                                                     |            |    |           |       |     |      |      |          |       |
| IL28RA                                                              | rs7552167 (Tsoi <i>et al.</i> , 2012)                               | rs10794648 | 1  | 24390793  | 0.4   | T/C | 0.25 | 0.89 | 0.0736   | 0.492 |
| LCE3D                                                               | rs4112788 (Strange <i>et al.</i> , 2010)                            | rs4085613  | 1  | 150816642 | 1.3   | A/C | 0.37 | 0.90 | 0.0599   | 1.000 |
| UBE2L3                                                              | rs4821124 (Tsoi <i>et al.</i> , 2012)                               | rs181360   | 22 | 20258916  | 50.4  | C/A | 0.20 | 1.10 | 0.1625   | 1.000 |
| B3GNT2                                                              | rs10865331 (Tsoi <i>et al.</i> , 2012)                              | rs2129506  | 2  | 62641583  | 236.6 | C/G | 0.18 | 0.89 | 0.1010   | 0.016 |
| ZDHHC23                                                             | rs1386478 (Ellinghaus <i>et al.</i> , 2012)                         | rs6438208  | 3  | 115652962 | 489.3 | A/G | 0.26 | 1.07 | 0.2892   | 0.010 |
| TNFAIP3                                                             | rs610604 (Nair <i>et al.</i> , 2009; Strange <i>et al.</i> , 2010)  | rs2327832  | 6  | 138014761 | 226.3 | G/A | 0.20 | 0.89 | 0.1046   | 0.025 |
| TAGAP                                                               | rs2451258 (Tsoi <i>et al.</i> , 2012)                               | rs7749135  | 6  | 159784898 | 358.3 | G/T | 0.30 | 1.09 | 0.1595   | 0.079 |

|                     |                                                                      |               |    |           |       |     |      |      |        |       |
|---------------------|----------------------------------------------------------------------|---------------|----|-----------|-------|-----|------|------|--------|-------|
| ELMO1               | rs2700987 (Tsoi <i>et al.</i> , 2012)                                | rs890111      | 7  | 37583608  | 230.8 | A/G | 0.37 | 0.91 | 0.0828 | 0.047 |
| ZC3H12C             | rs4561177 (Tsoi <i>et al.</i> , 2012)                                | rs11213393    | 11 | 109798387 | 330.7 | T/C | 0.07 | 1.21 | 0.0571 | 0.004 |
| Intergenic          | rs1975974 (Stuart <i>et al.</i> , 2010)                              | rs6587161     | 17 | 21372412  | 258.8 | C/T | 0.44 | 1.07 | 0.2165 | 0.009 |
| SDC4                | rs1008953 (Stuart <i>et al.</i> , 2010)                              | rs3091579     | 20 | 43380782  | 33.4  | A/G | 0.15 | 1.11 | 0.1767 | 0.001 |
| SLC45A1,<br>TNFRSF9 | rs11121129 (Tsoi <i>et al.</i> , 2012)                               | rs500508      | 1  | 7850043   | 340.6 | A/C | 0.27 | 1.15 | 0.0217 | 0.122 |
| CAPZB               | rs7667 (Ellinghaus <i>et al.</i> , 2012)                             | rs4912122     | 1  | 19749025  | 157.6 | A/G | 0.35 | 1.13 | 0.0307 | 0.092 |
| IL23R               | rs11209026 (Strange <i>et al.</i> , 2010)                            | rs11209026    | 1  | 67478546  | 0.0   | A/G | 0.06 | 0.67 | 0.0014 | 1.000 |
| IL23R               | rs2201841 (Nair <i>et al.</i> , 2009)                                | rs11209026    | 1  | 67478546  | 11.8  | A/G | 0.06 | 0.67 | 0.0014 | -     |
| REL                 | rs702873 (Strange <i>et al.</i> , 2010)                              | chr2:60452604 | 2  | 60452604  | 482.4 | G/C | 0.32 | 0.86 | 0.0099 | -     |
| Intergenic          | rs842636 (Stuart <i>et al.</i> , 2010)                               | chr2:60452604 | 2  | 60452604  | 492.9 | G/C | 0.32 | 0.86 | 0.0099 | -     |
| IFIH1               | rs17716942 (Strange <i>et al.</i> , 2010; Tsoi <i>et al.</i> , 2012) | rs2111485     | 2  | 162818782 | 150.2 | A/G | 0.37 | 0.84 | 0.0026 | 0.194 |
| Intergenic          | rs6809854 (Strange <i>et al.</i> , 2010)                             | rs17005662    | 3  | 19105997  | 346.6 | G/T | 0.12 | 0.83 | 0.0380 | 0.037 |
| ERAP1               | rs27524 (Strange <i>et al.</i> , 2010)                               | rs30998       | 5  | 96521945  | 394.2 | C/A | 0.06 | 0.76 | 0.0255 | 0.044 |
| IL13                | rs20541 (Nair <i>et al.</i> , 2009)                                  | rs848         | 5  | 132024399 | 0.5   | T/G | 0.21 | 0.80 | 0.0019 | 1.000 |
| EXOC2,<br>IRF4      | rs9504361 (Tsoi <i>et al.</i> , 2012)                                | rs9505193     | 6  | 738060    | 215.2 | C/A | 0.31 | 1.20 | 0.0018 | 0.003 |
| TRAF3IP2            | rs240993 (Strange <i>et al.</i> , 2010)                              | rs2179070     | 6  | 111992445 | 212.0 | C/T | 0.07 | 1.37 | 0.0023 | 0.041 |

|                                     |                                                                    |                |    |           |       |     |      |      |        |       |  |
|-------------------------------------|--------------------------------------------------------------------|----------------|----|-----------|-------|-----|------|------|--------|-------|--|
|                                     | <i>al.</i> , 2010)                                                 |                |    |           |       |     |      |      |        |       |  |
|                                     | rs33980500                                                         |                |    |           |       |     |      |      |        |       |  |
|                                     | (Ellinghaus <i>et al.</i> ,<br>2010; Tsoi <i>et al.</i> ,<br>2012) | rs2179070      | 6  | 111992445 | 27.5  | C/T | 0.07 | 1.37 | 0.0023 | 1.000 |  |
| TRAF3IP2                            | rs465969 (Strange <i>et al.</i> , 2010)                            | rs2179070      | 6  | 111992445 | 230.2 | C/T | 0.07 | 1.37 | 0.0023 | 0.546 |  |
| REV3L                               | rs11795343 (Tsoi <i>et al.</i> , 2012)                             | rs11795343     | 9  | 32513737  | 0.0   | C/T | 0.41 | 0.84 | 0.0015 | 1.000 |  |
| DDX58                               | rs10979182 (Tsoi <i>et al.</i> , 2012)                             | rs627610       | 9  | 109939112 | 82.3  | A/C | 0.24 | 1.18 | 0.0080 | 0.012 |  |
| KLF4                                | rs1076160 (Nair <i>et al.</i> , 2009)                              | rs7026201      | 9  | 134387619 | 378.2 | G/A | 0.10 | 1.24 | 0.0145 | 0.000 |  |
| TSC1                                | rs3802826 (Tsoi <i>et al.</i> , 2012)                              | rs1238566      | 11 | 128120696 | 209.0 | G/A | 0.45 | 1.17 | 0.0052 | 0.016 |  |
| ETS1                                | rs7993214 (Liu <i>et al.</i> , 2008)                               | rs9576804      | 13 | 38919841  | 329.1 | G/C | 0.45 | 1.15 | 0.0085 | 0.009 |  |
| COG6                                | rs4780355 (Ellinghaus <i>et al.</i> , 2012)                        | chr16:11596516 | 16 | 11596516  | 341.2 | T/C | 0.32 | 0.86 | 0.0123 | -     |  |
| SOCS1                               | rs4795067 (Stuart <i>et al.</i> , 2010)                            | rs9909148      | 17 | 23334619  | 203.8 | C/T | 0.27 | 1.19 | 0.0040 | 0.001 |  |
| NOS2<br>PTRF,<br>STAT3,<br>STAT5A/B | rs963986 (Tsoi <i>et al.</i> , 2012)                               | rs8070945      | 17 | 37820177  | 5.1   | T/C | 0.22 | 1.14 | 0.0429 | 0.000 |  |

Abbreviations: Chr, chromosome; Dist, distance; EA, effect allele; OA, other allele; EAF, effect allele frequency; OR, odds ratio; SNP single nucleotide polymorphism.

<sup>1</sup>The MetaboChip covers 45 established psoriasis loci with SNPs in a region of 500kb.

<sup>2</sup>For each previously reported SNP the SNP with the best p-value (and good quality) within in a 500kb region around the reported SNP of the metabochip analyses is reported and  $r^2$ -values between both are presented based on 1000genomes data.



Figure S1. Forest plot displaying the associations of each psoriasis single nucleotide polymorphism (SNP) with coronary artery disease (CAD) in the Coronary Artery Disease Genome-Wide Replication And Meta-Analysis (CARDIoGRAM).<sup>1</sup>

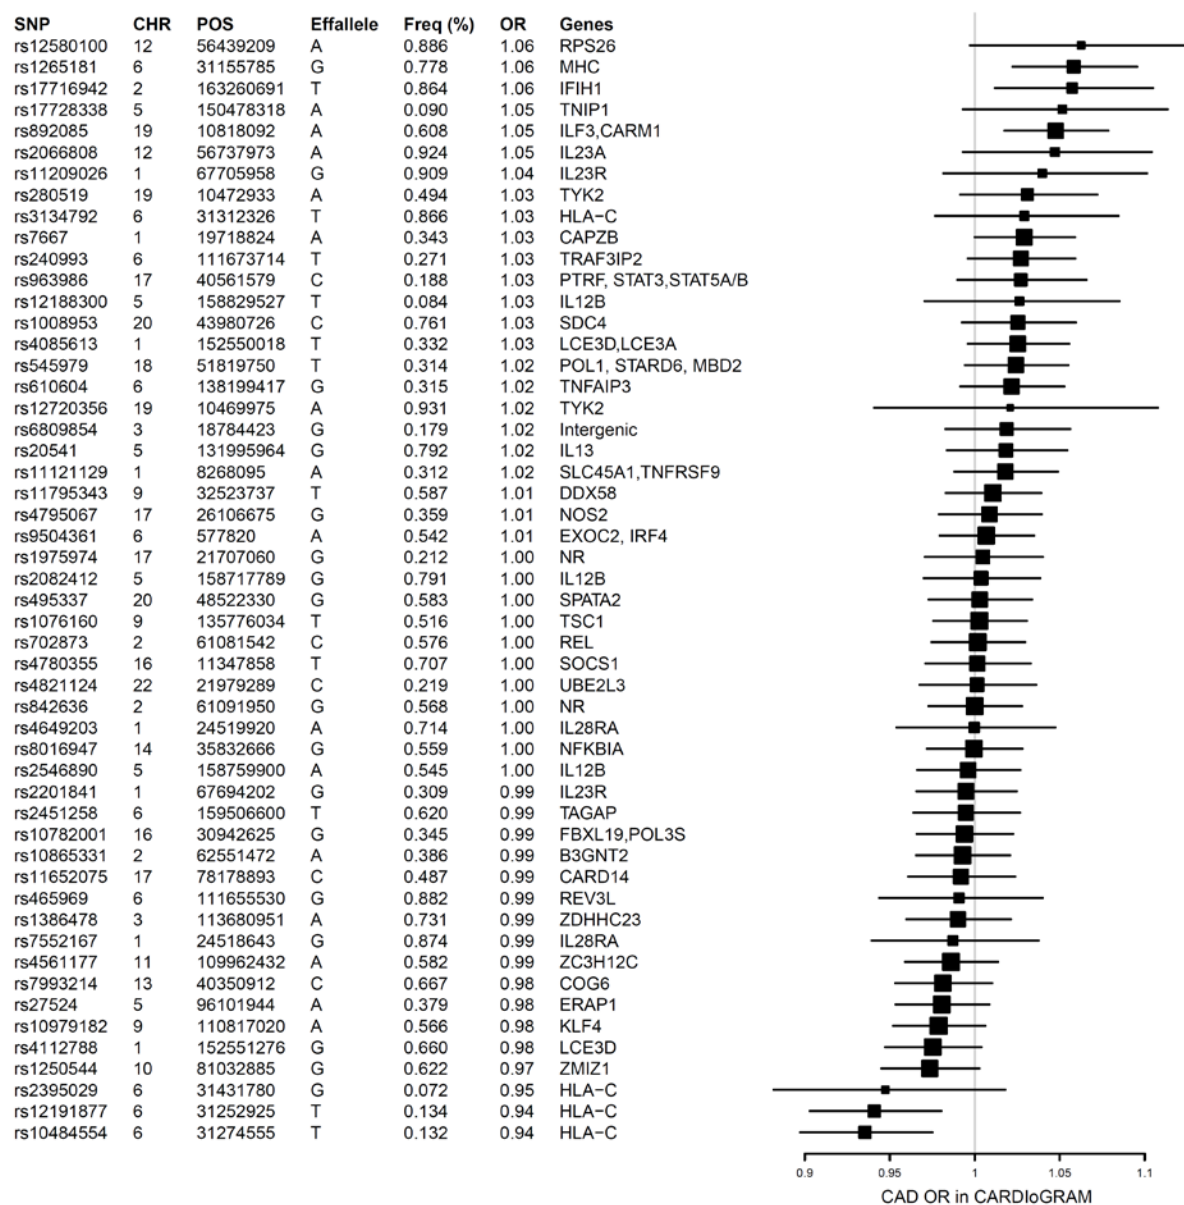

Abbreviations: CHR, chromosome; POS, position; Effallele, effect allele; Freq, effect allele frequency, single nucleotide polymorphism, SNP.

<sup>1</sup>Boxes represent the ORs for CAD by SNP variant and whiskers 95% confidence intervals.

Size of boxes is proportional to the inverse variance of ORs.
